# Supplementary material
Source: PubMed Central journal article supplement (PMC126627)
Supplement: pnas_152298499_1.pdf [file pnas_152298499_1.pdf]

**Table 2. Serotype M3 strains examined for the presence of *sla*, *speK*, and associated phage**

| MGAS No.* | Locality                | Year        | <i>sla/speK</i> <sup>†</sup> |
|-----------|-------------------------|-------------|------------------------------|
| 1251      | United Kingdom          | 1920s       | neg/neg                      |
| 1254      | New York, United States | 1937        | neg/neg                      |
| 171       | Ottawa, Canada          | Early 1940s | neg/neg                      |
| 173       | Ottawa, Canada          | Early 1940s | neg/neg                      |
| 174       | Ottawa, Canada          | Early 1940s | neg/neg                      |
| 175       | Ottawa, Canada          | Early 1940s | neg/neg                      |
| 176       | Ottawa, Canada          | Early 1940s | neg/neg                      |
| 177       | Ottawa, Canada          | Early 1940s | neg/neg                      |
| 178       | Ottawa, Canada          | Early 1940s | neg/neg                      |
| 179       | Ottawa, Canada          | Early 1940s | neg/neg                      |
| 180       | Ottawa, Canada          | Early 1940s | neg/neg                      |
| 182       | Ottawa, Canada          | Early 1940s | neg/neg                      |
| 568       | Illinois, United States | 1940s       | neg/neg                      |
| 626       | Illinois, United States | 1940s       | neg/neg                      |
| 1368      | Rostock, Germany        | 1969        | neg/neg                      |
| 1369      | Muhlhausen, Germany     | 1969        | neg/neg                      |
| 1372      | Berlin, Germany         | 1969        | neg/neg                      |
| 1373      | Bautzen, Germany        | 1969        | neg/neg                      |
| 1378      | Rostock, Germany        | 1969        | neg/neg                      |
| 1380      | Frankfurt, Germany      | 1969        | neg/neg                      |
| 1382      | Chemnitz, Germany       | 1969        | neg/neg                      |
| 1383      | Bautzen, Germany        | 1971        | neg/neg                      |
| 1385      | Madgeburg, Germany      | 1971        | neg/neg                      |
| 1409      | Dessau, Germany         | 1971        | neg/neg                      |
| 1410      | Greifswald, Germany     | 1971        | neg/neg                      |
| 1413      | Berlin, Germany         | 1971        | neg/neg                      |
| 1414      | Cottbus, Germany        | 1971        | neg/neg                      |
| 1387      | Wernigerode, Germany    | 1972        | neg/neg                      |
| 1389      | Wernigerode, Germany    | 1972        | neg/neg                      |
| 1390      | Gera, Germany           | 1972        | neg/neg                      |
| 1392      | Leipzig, Germany        | 1972        | neg/neg                      |

| MGAS No.* | Locality             | Year | <i>sla/speK</i> <sup>†</sup> |
|-----------|----------------------|------|------------------------------|
| 1393      | Schwein, Germany     | 1972 | neg/neg                      |
| 1394      | Madgeburg, Germany   | 1972 | neg/neg                      |
| 1395      | Zickwau, Germany     | 1972 | neg/neg                      |
| 1397      | Dessau, Germany      | 1972 | neg/neg                      |
| 1398      | Greifswald, Germany  | 1972 | neg/neg                      |
| 1401      | Gotha, Germany       | 1972 | neg/neg                      |
| 1403      | Gera, Germany        | 1973 | neg/neg                      |
| 1404      | Madgeburg, Germany   | 1973 | neg/neg                      |
| 1406      | Wernigerode, Germany | 1973 | neg/neg                      |
| 1407      | Schwein, Germany     | 1973 | neg/neg                      |
| 1415      | Erlabrunn, Germany   | 1973 | neg/neg                      |
| 1416      | Suhl, Germany        | 1973 | neg/neg                      |
| 1418      | Jena, Germany        | 1973 | neg/neg                      |
| 1419      | Erfurt, Germany      | 1973 | neg/neg                      |
| 1421      | Zwickwau, Germany    | 1973 | neg/neg                      |
| 1427      | Muhlhausen, Germany  | 1974 | neg/neg                      |
| 1428      | Cottbus, Germany     | 1974 | neg/neg                      |
| 1429      | Berlin-Buch, Germany | 1974 | neg/neg                      |
| 1308      | Schwerin, Germany    | 1981 | neg/neg                      |
| 1313      | Muhlhausen, Germany  | 1982 | neg/neg                      |
| 1316      | Erfurt, Germany      | 1982 | neg/neg                      |
| 1319      | Chemnitz, Germany    | 1982 | neg/neg                      |
| 1324      | Neustrelitz, Germany | 1982 | neg/neg                      |
| 1325      | Muhlhausen, Germany  | 1982 | neg/neg                      |
| 1326      | Neustrelitz, Germany | 1982 | neg/neg                      |
| 1327      | Dessau, Germany      | 1982 | neg/neg                      |
| 1328      | Greifswald, Germany  | 1982 | neg/neg                      |
| 1330      | Leipzig, Germany     | 1982 | neg/neg                      |
| 1334      | Chemnitz, Germany    | 1983 | neg/neg                      |
| 1336      | Leipzig, Germany     | 1983 | neg/neg                      |
| 1343      | Madgeburg, Germany   | 1983 | neg/neg                      |
| 1344      | Rostock, Germany     | 1983 | neg/neg                      |

| MGAS No.* | Locality                  | Year        | <i>sla/speK</i> <sup>†</sup> |
|-----------|---------------------------|-------------|------------------------------|
| 1346      | Frankfurt, Germany        | 1983        | neg/neg                      |
| 1347      | Bautzen, Germany          | 1983        | neg/neg                      |
| 1348      | Dessau, Germany           | 1984        | neg/neg                      |
| 2231      | New Zealand               | Early 1980s | neg/neg                      |
| 1519      | Moscow, Russia            | 1987        | neg/neg                      |
| 1610      | United States             | Late 1980s  | pos/pos                      |
| 1611      | United States             | Late 1980s  | pos/pos                      |
| 1612      | United States             | Late 1980s  | pos/pos                      |
| 1638      | United States             | Late 1980s  | pos/pos                      |
| 157       | Minnesota, United States  | Late 1980s  | neg/neg                      |
| 159       | Utah, United States       | Late 1980s  | pos/pos                      |
| 259       | California, United States | Late 1980s  | pos/pos                      |
| 274       | Colorado, United States   | Late 1980s  | pos/pos                      |
| 322       | Oregon, United States     | Late 1980s  | pos/pos                      |
| 1558      | Berlin-Buch, Germany      | 1989        | pos/pos                      |
| 1559      | Wernigerode, Germany      | 1989        | pos/pos                      |
| 1560      | Magdeburg, Germany        | 1989        | pos/pos                      |
| 1561      | Erfurt, Germany           | 1989        | pos/pos                      |
| 1562      | Erlabrunn, Germany        | 1989        | pos/pos                      |
| 1563      | Zwickau, Germany          | 1990        | pos/pos                      |
| 1564      | Berlin-Buch, Germany      | 1990        | pos/pos                      |
| 1565      | Suhl, Germany             | 1990        | pos/pos                      |
| 1566      | Potsdam, Germany          | 1990        | pos/pos                      |
| 1567      | Bautzen, Germany          | 1990        | pos/pos                      |
| 1568      | Cottbus, Germany          | 1990        | pos/pos                      |
| 1569      | Berlin, Germany           | 1990        | pos/pos                      |
| 1570      | Neustrelitz, Germany      | 1990        | pos/pos                      |
| 1571      | Rostock, Germany          | 1990        | pos/pos                      |
| 1572      | Erfurt, Germany           | 1990        | pos/pos                      |
| 3374      | Ontario, Canada           | 1994        | pos/pos                      |
| 3375      | Ontario, Canada           | 1994        | pos/pos                      |
| 3376      | Ontario, Canada           | 1994        | pos/pos                      |

| MGAS No.* | Locality                 | Year | <i>sla/speK</i> † |
|-----------|--------------------------|------|-------------------|
| 3377      | Ontario, Canada          | 1994 | pos/pos           |
| 3379      | Ontario, Canada          | 1994 | pos/pos           |
| 3382      | Ontario, Canada          | 1994 | pos/pos           |
| 3383      | Ontario, Canada          | 1994 | pos/pos           |
| 3384      | Ontario, Canada          | 1994 | pos/pos           |
| 3297      | Minnesota, United States | 1995 | pos/pos           |
| 3306      | Minnesota, United States | 1995 | pos/pos           |
| 3318      | Minnesota, United States | 1995 | pos/pos           |
| 3350      | Minnesota, United States | 1995 | neg/neg           |
| 3369      | Minnesota, United States | 1995 | pos/pos           |
| 3388      | Ontario, Canada          | 1995 | pos/pos           |
| 3389      | Ontario, Canada          | 1995 | pos/pos           |
| 9246      | Ontario, Canada          | 1995 | pos/pos           |
| 6129      | Texas, United States     | 1998 | pos/pos           |
| 6132      | Texas, United States     | 1998 | pos/pos           |
| 6134      | Texas, United States     | 1998 | pos/pos           |
| 6147      | Texas, United States     | 1998 | pos/pos           |
| 6165      | Texas, United States     | 1998 | pos/pos           |
| 6740      | Texas, United States     | 1998 | pos/pos           |
| 7555      | Illinois, United States  | 1998 | pos/pos           |
| 7630      | Illinois, United States  | 1998 | pos/pos           |
| 9056      | Illinois, United States  | 1998 | neg/neg           |
| 9254      | Ontario, Canada          | 2000 | pos/pos           |
| 9497      | Texas, United States     | 2001 | pos/pos           |
| 9507      | Texas, United States     | 2001 | pos/pos           |
| 9681      | Texas, United States     | 2001 | pos/pos           |

\*Musser GAS strain collection number.

†Presence or absence of *sla* and *speK* genes based on PCR.
