# Supplementary material
Source: PubMed Central journal article supplement (PMC126627)
Supplement: pnas_152298499_5.pdf [file pnas_152298499_5.pdf]

**Table 4. Characteristics of the sequenced GAS genomes**

|           | M3<br>MGAS315 | M18<br>MGAS 8232 <sup>*</sup> | M1<br>SF370 <sup>†</sup> |
|-----------|---------------|-------------------------------|--------------------------|
| Size (bp) | 1,900,521     | 1,895,017                     | 1,852,442                |
| % G+C     | 38.6          | 38.6                          | 38.5                     |
| CDSs      | 1,865         | 1,889                         | 1,752                    |
| Phage     | No.           | 6                             | 5                        |
|           | Size (kbp)    | 235.0                         | 204.0                    |
|           | %             | 12.4                          | 10.8                     |

<sup>\*</sup>Ref. 5.

<sup>†</sup>Ref. 12.
