# Supplementary material
Source: PubMed Central journal article supplement (PMC126627)
Supplement: pnas_152298499_6.pdf [file pnas_152298499_6.pdf]

**Table 5. BLAST comparisons of sequenced GAS genomes CDSs**

| CDS                 | M3 vs. M1<br>(TBLASTN) | M1 vs. M3<br>(BLASTP) | M3 vs. M18<br>(TBLASTN) | M18 vs. M3<br>(BLASTP) |
|---------------------|------------------------|-----------------------|-------------------------|------------------------|
| Common <sup>*</sup> | 1641/1865<br>88.0%     | 1607/1752<br>91.7%    | 1753/1894<br>92.6%      | 1761/1889<br>93.2%     |
| Unique <sup>†</sup> | 224/1865<br>12.0%      | 145/1752<br>8.3%      | 141/1894<br>7.4%        | 128/1889<br>6.8%       |
| Phage and unique    | 201/224<br>89.7%       | 71/145<br>49.0%       | 112/141<br>79.4%        | 71/128<br>55.5%        |

<sup>\*</sup>A CDS was defined “common” if it had a homologue in the comparison genome sharing greater than 50% positive (identical plus similar) amino acids across its complete sequence.

<sup>†</sup>A CDS was defined “unique” if it lacked a homologue in the comparison genome sharing greater than 50% positive (identical plus similar) amino acids across its complete sequence.
