# Supplementary material
Source: PubMed Central journal article supplement (PMC126627)
Supplement: pnas_152298499_7.pdf [file pnas_152298499_7.pdf]

**Table 6. Characteristics of phages present in the sequenced GAS genomes**

| Phage  | Insertion <sup>*</sup><br>site | Size kbp | Virulence <sup>†</sup><br>factor(s) | % G+C | CDS |
|--------|--------------------------------|----------|-------------------------------------|-------|-----|
| 315.1  | 1049-1053                      | 39.5     | None                                | 37.8  | 56  |
| 315.2  | 1289-1290                      | 40.1     | <i>ssa</i>                          | 38.3  | 60  |
| 315.3  | 1434-1491                      | 34.4     | <i>mf4</i>                          | 38.0  | 52  |
| 315.4  | 1556-1557                      | 41.8     | <i>speK, sla</i>                    | 38.6  | 64  |
| 315.5  | 1606-1607                      | 38.2     | <i>speA3</i>                        | 38.1  | 55  |
| 315.6  | 1672-1673                      | 40.0     | <i>sdn</i>                          | 39.7  | 51  |
| 8232.1 | 0342-0343                      | 39.0     | <i>speA1</i>                        | 37.7  | 53  |
| 8232.2 | 0654-0713                      | 41.1     | <i>speC, mf2</i>                    | 38.2  | 60  |
| 8232.3 | 1289-1290                      | 46.7     | <i>speL, speM</i>                   | 37.6  | 69  |
| 8232.4 | 1434-1491                      | 35.4     | <i>mf3</i>                          | 37.7  | 56  |
| 8232.5 | 1736-1737                      | 41.8     | <i>sda</i>                          | 38.5  | 56  |
| 370.1  | 0654-0713                      | 40.9     | <i>speC, mf2</i>                    | 39.3  | 49  |
| 370.2  | 0936-1010                      | 42.5     | <i>speI, speH</i>                   | 38.0  | 57  |
| 370.3  | 1434-1491                      | 33.5     | <i>mf3</i>                          | 38.0  | 48  |
| 370.4  | 2121-2148                      | 13.5     | None                                | 36.8  | 18  |

<sup>\*</sup>SPy gene numbers from the M1 SF370 genome are given for CDSs flanking the phages.

<sup>†</sup>Only the putative secreted virulence factors encoded at the phage ends are listed.
