# Supplementary material
Source: PubMed Central journal article supplement (PMC126627)

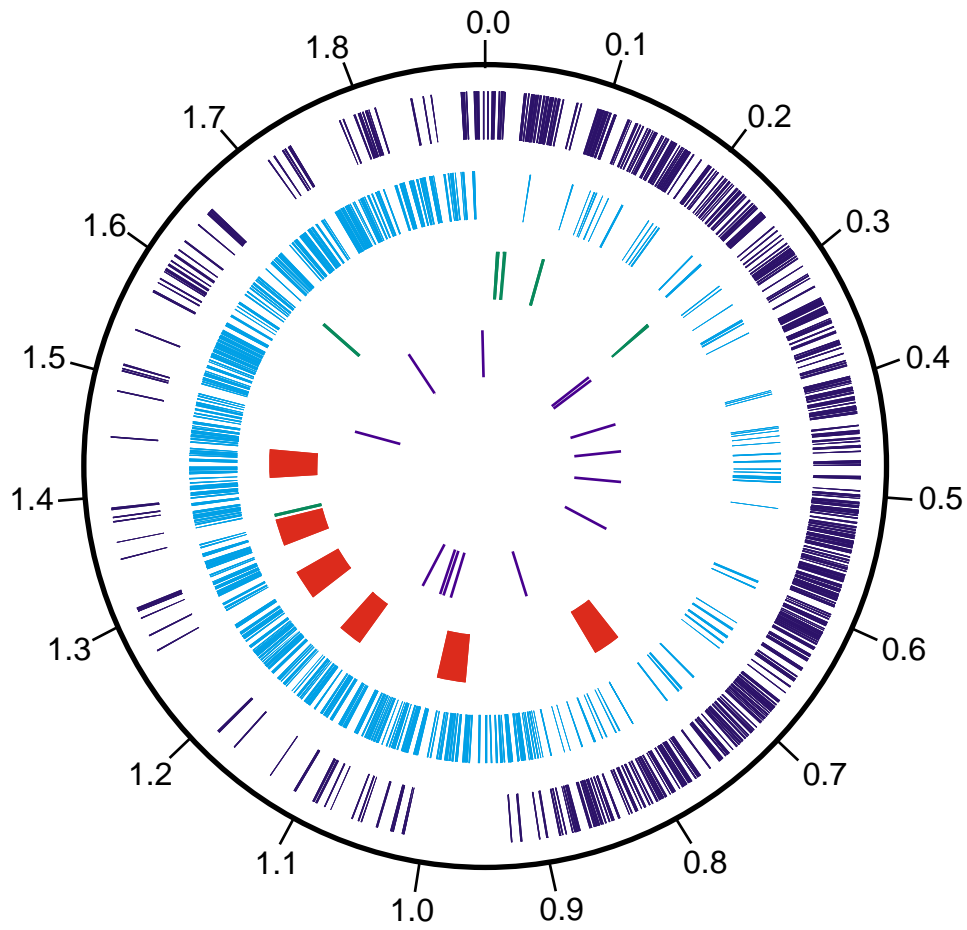

Supplement: pnas_152298499_10.pdf [file pnas_152298499_10.pdf]

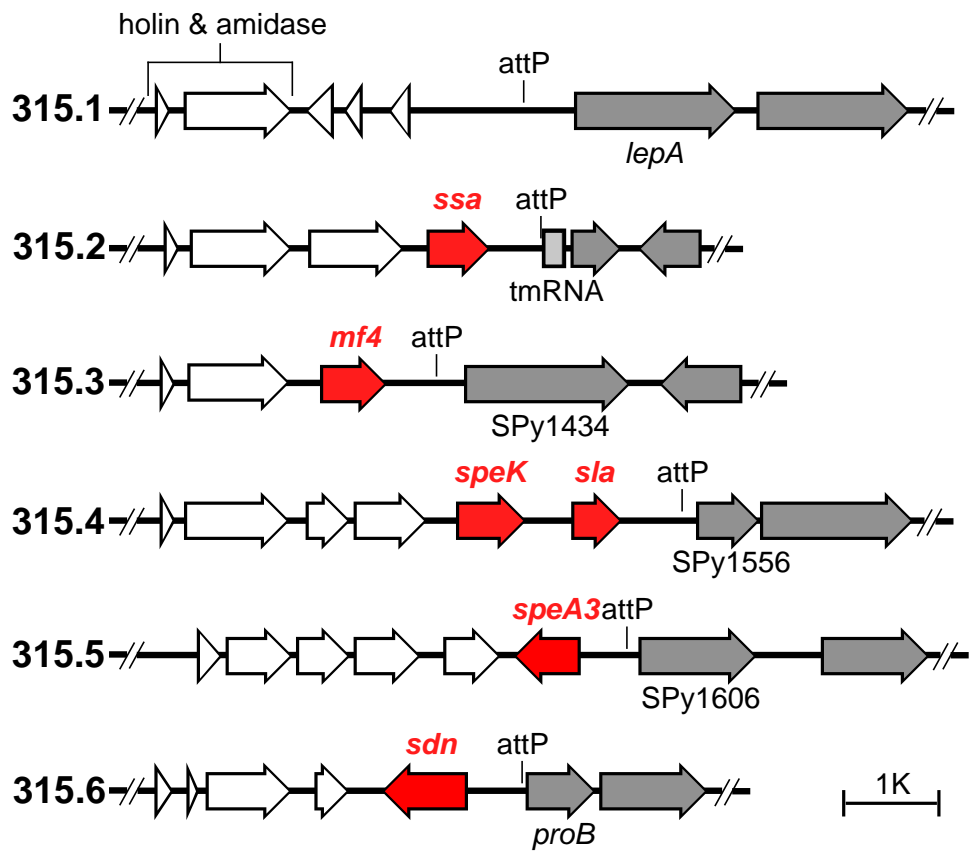

Supplement: pnas_152298499_11.pdf [file pnas_152298499_11.pdf]

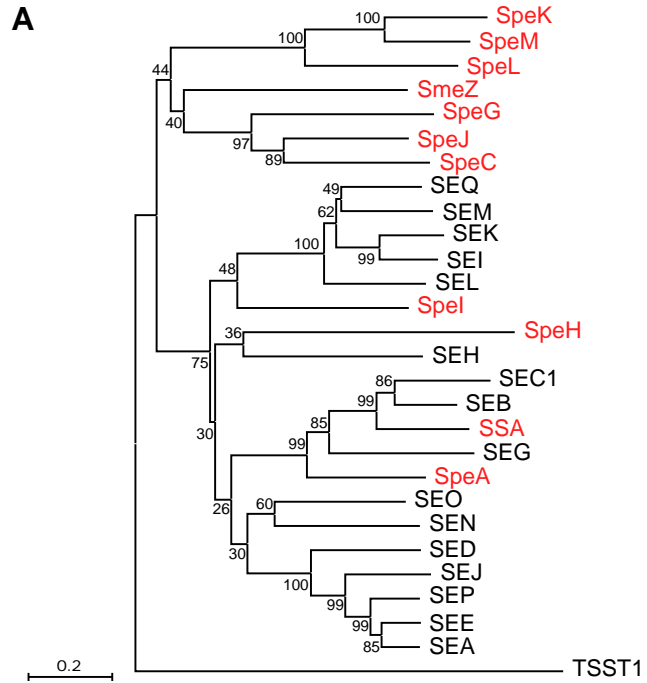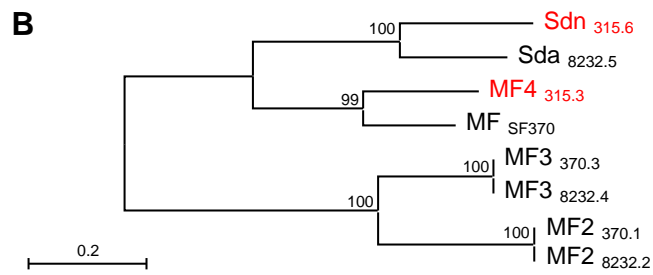

Supplement: pnas_152298499_12.pdf [file pnas_152298499_12.pdf]
